# Supplementary material for: Anti-Telomerase CD4+ Th1 Immunity and Monocytic-Myeloid-Derived-Suppressor Cells Are Associated with Long-Term Efficacy Achieved by Docetaxel, Cisplatin, and 5-Fluorouracil (DCF) in Advanced Anal Squamous Cell Carcinoma: Translational Study of Epitopes-HPV01 and 02 Trials
Source: PubMed Central journal article supplement (PMC7554943; doi:10.3390/ijms21186838), 2020-09-17
Supplement: ijms-21-06838-s001.pdf [file ijms-21-06838-s001.pdf]

# Anti-Telomerase CD4<sup>+</sup> Th1 Immunity and Monocytic-Myeloid-Derived-Suppressor Cells are Associated with Long-Term Efficacy Achieved by Docetaxel, Cisplatin, and 5-Fluorouracil (DCF) in Advanced Anal Squamous Cell Carcinoma: Translational Study of Epitopes-HPV01 and 02 Trials

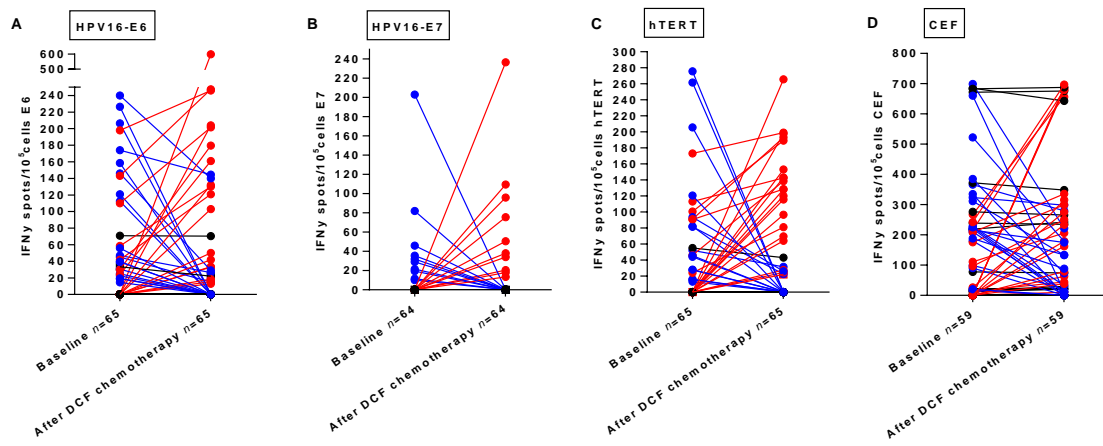

**Figure S1.** The overall effect of DCF treatment on the antigen-specific T-cell responses in SCCA patients. PBMC from SCCA patients whose samples were available before and after DCF chemotherapy ( $n = 65$  for E6 and hTERT,  $n = 64$  for E7 and  $n = 59$  for CEF) were analyzed for antigen-specific T-cell responses by IFN $\gamma$  ELISpot assay. (A–D) The linking individual plot was used to follow the intensity of HPV16-E6 (A), HPV16-E7 (B), hTERT (C) and antiviral T-cell responses (D) in SCCA patients before and after treatment. Increase specific-immune responses are represented by red gray points, decrease specific-immune responses by blue points and absence of immune responses by black points.

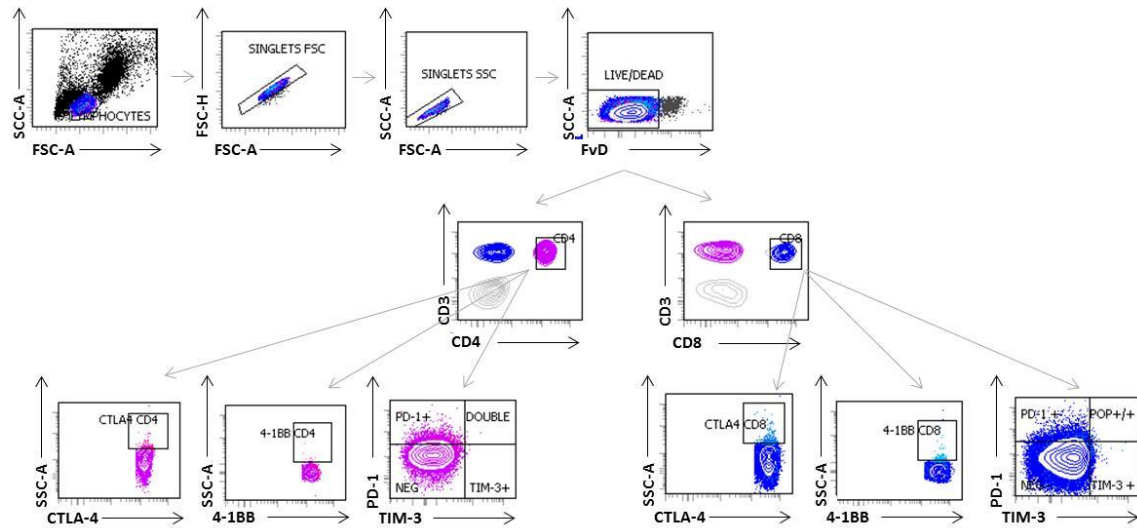

A

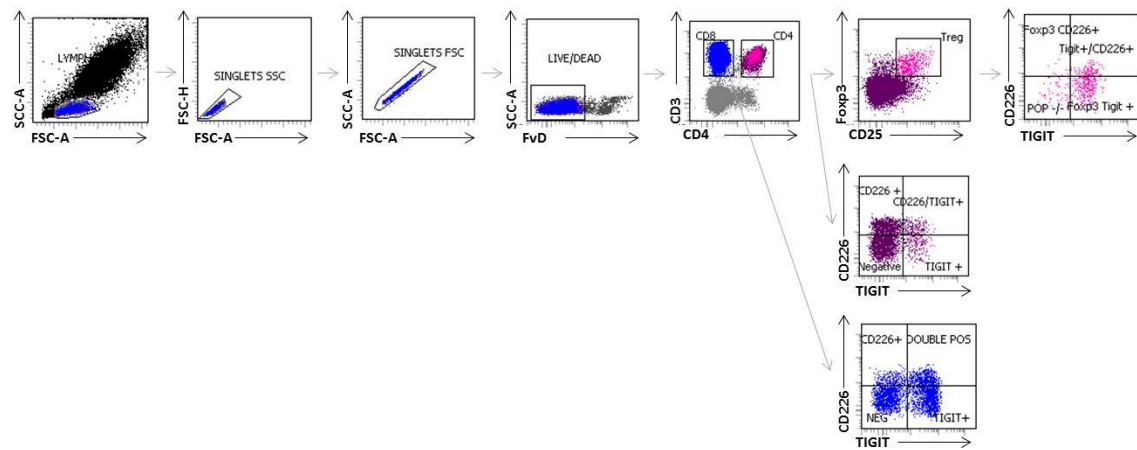

B

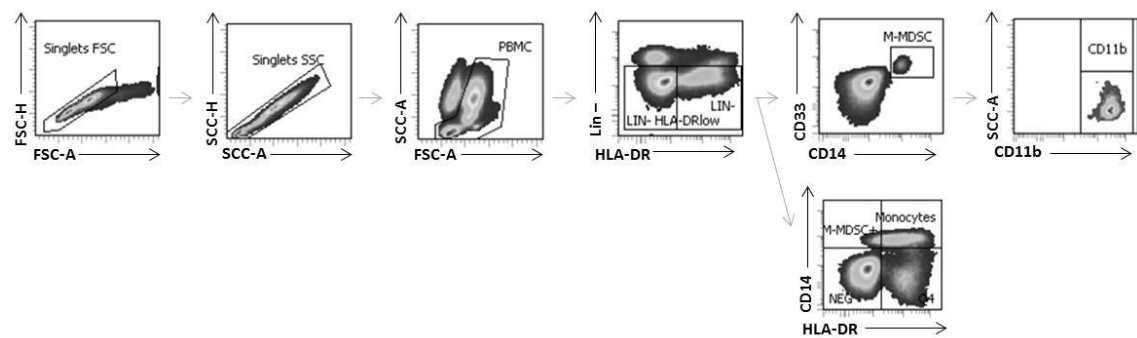

C

**Figure S2.** Gating strategy for flow cytometry analyses. The figure shows the gating strategy to analyze immune checkpoints (A), Treg (B) or M-MDSC (C) populations. After exclusion of doublets and death cells, CD4 and CD8 T-cell populations were sectioned. The expression of CTLA-4 (or OX40), 4-1BB, PD-1 and TIM-3 were analyzed on CD4 and CD8 T-cells (A). Frequencies of Treg cells were observed in CD4 T-cell population. Expression of CD226 and TIGIT were analyzed on CD4, Treg and CD8 T-cells (B). M-MDSC and monocyte populations were analyzed after exclusion of lineage (CD3, CD56, CD19) and among PBMC (C).

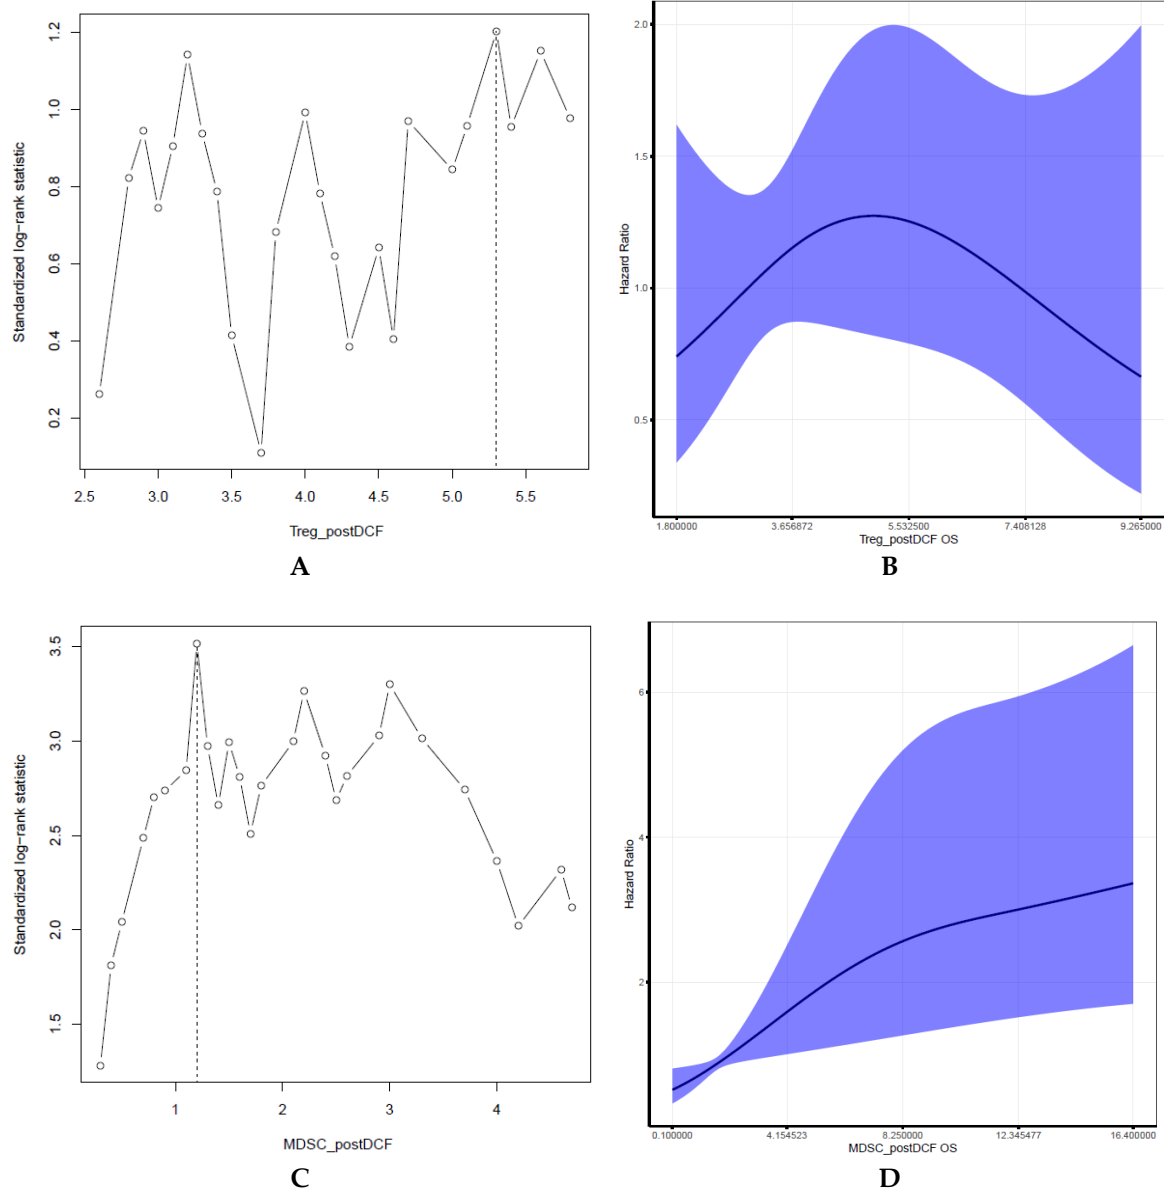

**Figure S3.** Determining thresholds for Treg and M-MDSC populations. The thresholds of Treg (A) and M-MDSC (C) populations after DCF treatment were chosen with maximizing of the log-rank test (maxstat cutoff). The relationship between overall survival and Treg (B) and M-MDSC (D) distributions was also investigated using the restricted cubic splines method with graphical evaluation. The selected thresholds were used to analyze the association of Treg and M-MDSC high subpopulations with immune responses and survival of SSCA patients.

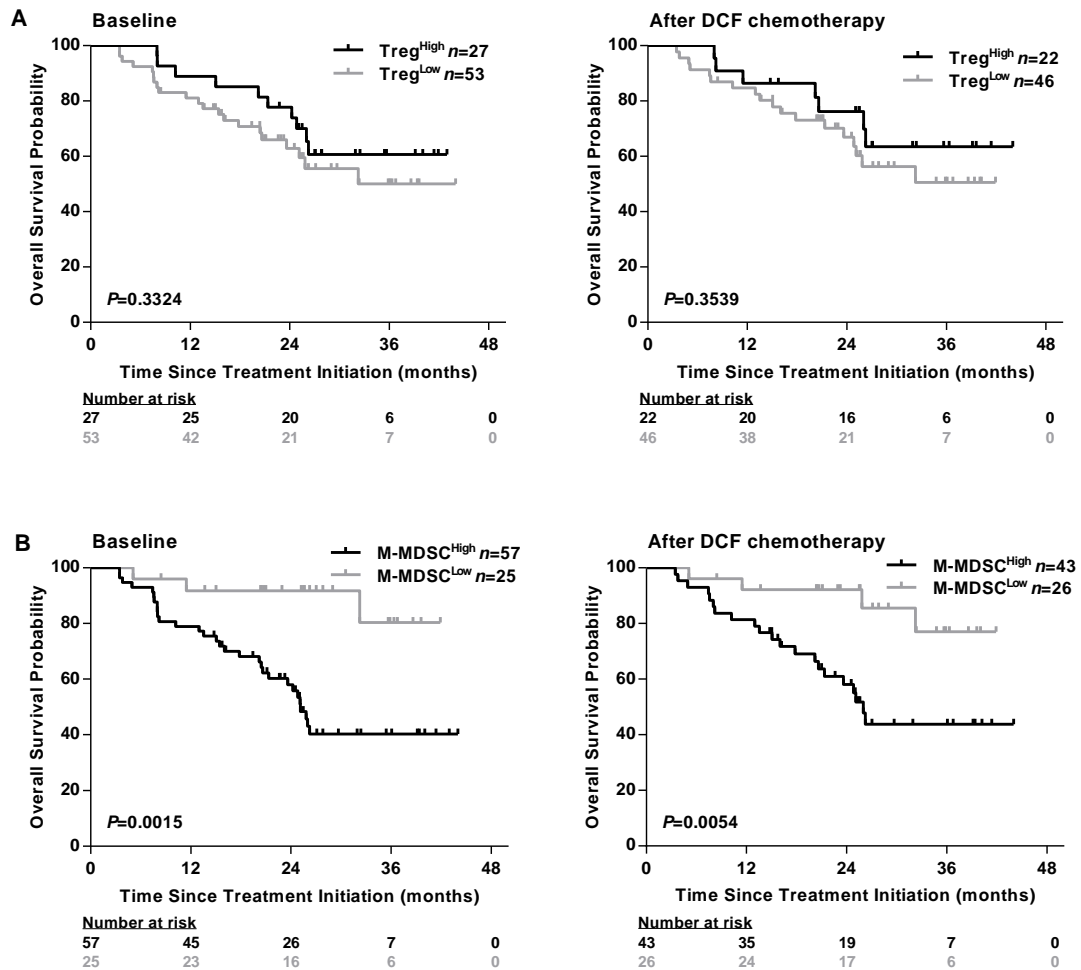

**Figure S4.** M-MDSC levels and not Treg levels are associated with the clinical outcomes of SCCA patients. PBMC from 19 healthy donors and SCCA patients before ( $n = 82$ ) and after ( $n = 69$ ) DCF chemotherapy were analyzed for Treg and M-MDSC populations by flow cytometry. A Kaplan-Meier OS curve in SCCA patients before and after DCF chemotherapy according to Treg levels. B Kaplan-Meier OS curve in SCCA patients before and after DCF chemotherapy according to M-MDSC levels. Log-rank test, where \*\*  $p < 0.01$ .

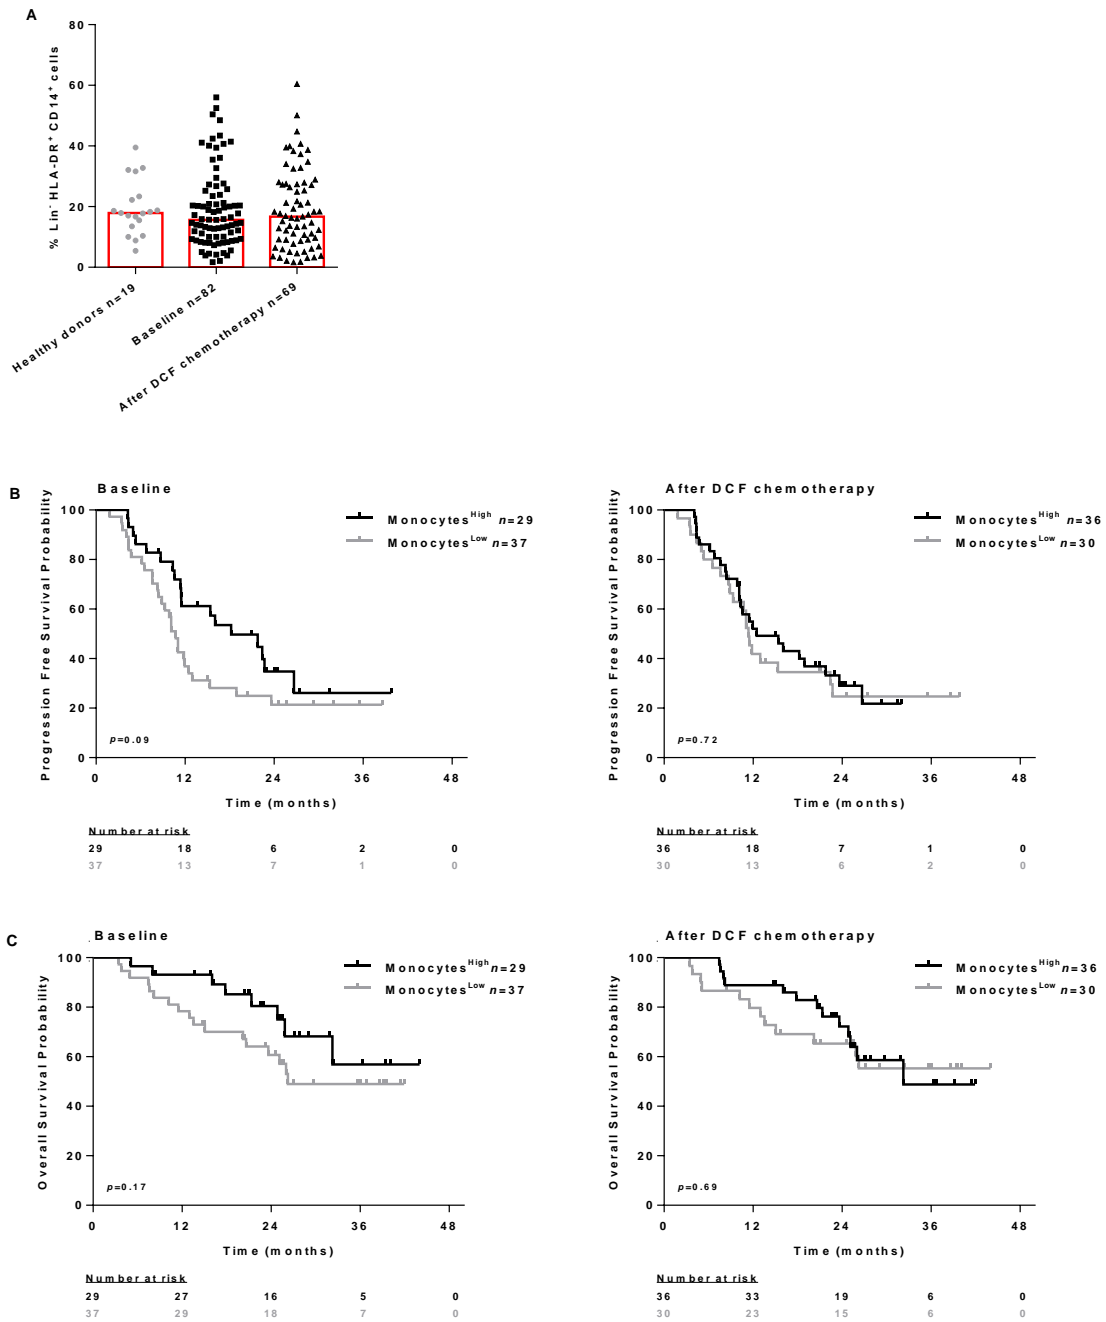

**Figure S5.** Monocyte levels are not associated with the clinical outcomes of SCCA patients. PBMC from 19 healthy donors and SCCA patients before ( $n = 82$ ) and after ( $n = 69$ ) DCF chemotherapy were analyzed for monocytes populations by flow cytometry. **(A)** Frequencies (%) of monocytes. We selected a median at the threshold (16.1%) to separate into 2 groups our patients. **(B)** Kaplan-Meier survival curve in SCCA patients before and after DCF chemotherapy. **(C)** Kaplan-Meier OS curve in SCCA patients before and after DCF chemotherapy according to monocytes levels.

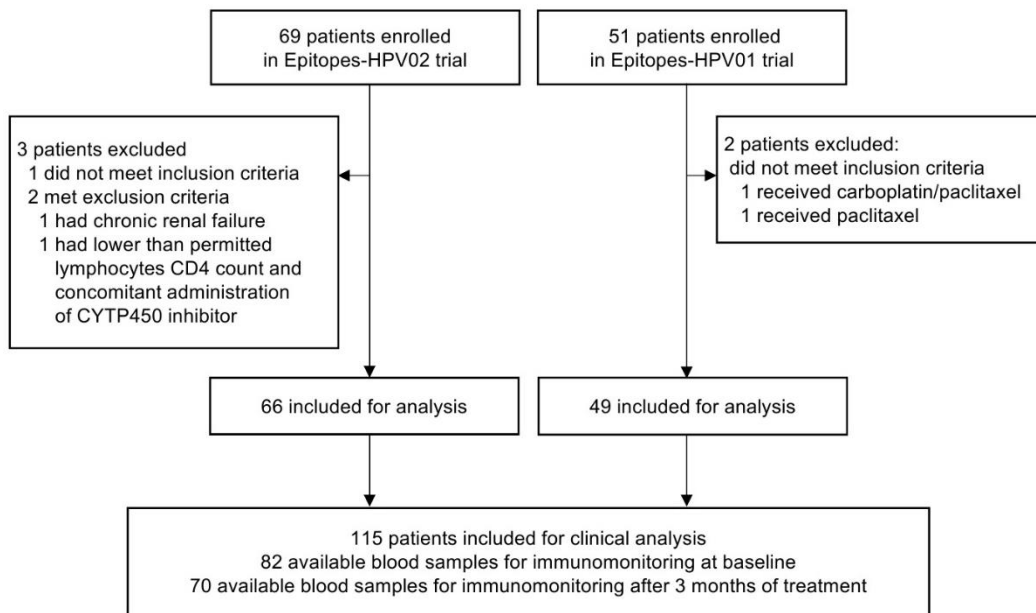

**Figure S6.** Flowchart. DCF = docetaxel, cisplatin and 5-fluorouracil.
